# Supplementary material
Source: Springer Nature journal article supplement (https://www.springermedizin.de/resource/supplementary/13024_2011_334_MOESM6_ESM.pdf/9643776)

**A Soluble fraction**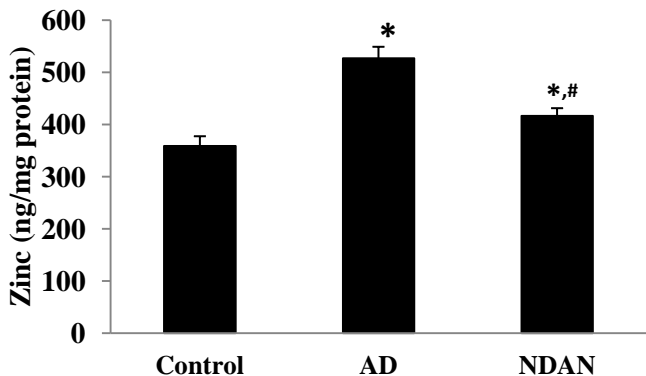**B Synaptic vesicle fraction**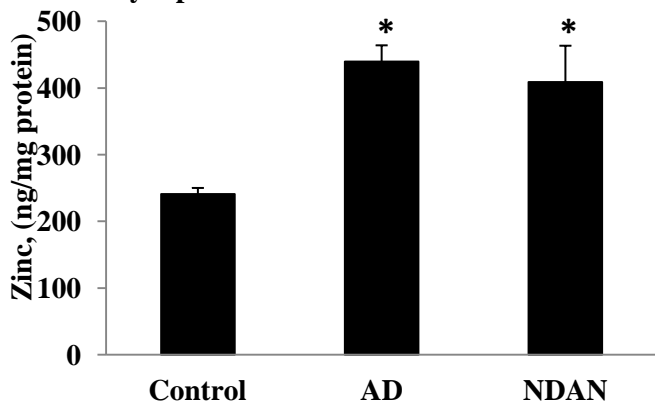**C**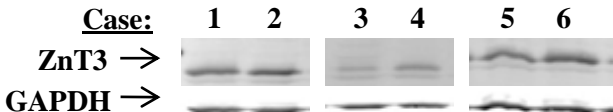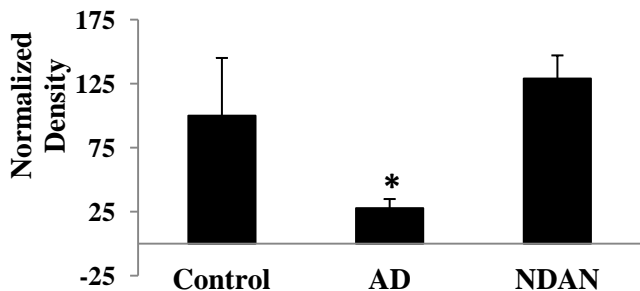

Supplement: MOESM6 [file 9643776]
